# Supplementary material
Source: publisher figshare collection journal article supplement (https://acs.figshare.com/ndownloader/files/18727640)
Supplement: Supplementary file 1 [file 18727640]

## Sheet: Effect of Database Size
Effect of database size on MiCId v.12.13.2018
MS/MS data files 41-87 were searched against DB-32, DB-Medium and DB-Largest constructed as described in the manuscript.
Precursor Ion and Product Ion tolerance of 10 ppm. Trypsin was used to digest proteins. Cysteine was carboxymethylated.
Species level identification was controlled using an E-value cutoff of 0.01.
TableS3-1: Species identified by MiCId when DFs 41-87 are used to query DB-32, DB-Medium and DB-Largest.
True Positives Identified When Searching DB-32
Species	Expected Rank	Expected natural log of E-value	Number of times specis is identified	Expected number of identified peptides	Expected number of species specific peptides
Agrobacterium fabrum	1	-277.36	47	244.66	56.45
Alteromonas macleodii	1.11	-80.54	36	105.94	20.31
Bacillus subtilis	1	-128.75	47	92.62	27.83
Burkholderia xenovorans	1	-9.07	2	93	0.5
Chlamydomonas reinhardtii	1	-282.06	47	232.49	75.13
Chromobacterium violaceum	1	-140.81	47	146.17	33.7
Cupriavidus metallidurans	1	-656.6	47	407	144.74
Desulfovibrio vulgaris	1	-42.6	16	59.75	10.19
Enterobacteria_phage_ES18	0	0	0	0	0
Enterobacteria_phage_M2	0	0	0	0	0
Escherichia coli	1	-306.57	47	453.4	33.81
Escherichia virus M13	0	0	0	0	0
Nitrosomonas europaea	1	-17.99	1	94	1
Nitrosomonas ureae	0	0	0	0	0
Nitrososphaera viennensis	1	-49.1	41	34.22	13.88
Nitrosospira multiformis	1	-17.06	3	84.33	2.67
Paracoccus denitrificans	1.02	-81.01	45	86.51	18.62
Pseudomonas.sp.ATCC.13867 (or Pseudomonas denitrificans)	1	-234.52	47	279.98	40.62
Pseudomonas fluorescens	1	-367.19	47	302.7	70.91
Pseudomonas furukawaii (or Pseudomonas oleovorans)	1	-209.69	44	277.3	33.55
Rhizobium leguminosarum	1	-353.01	47	295.7	74.06
Roseobacter sp AK199	1	-165.22	47	133.62	41
Salmonella enterica	1	-1017.06	47	597.23	116.34
Salmonella phage FelixO1	1	-6.72	3	2.67	2
Salmonella virus P22	1	-6.6	8	3.62	2.62
Staphylococcus aureus	1.14	-108.82	37	85.03	26.92
Stenotrophomonas maltophilia	1	-604.75	47	353.77	145.7
Thermus thermophilus	1	-182.44	47	122.45	48.55
True Positives Identified When Searching DB-Medium
Species	Expected Rank	Expected natural log of E-value	Number of times specis is identified	Expected number of identified peptides	Expected number of species specific peptides
Agrobacterium fabrum	1	-399.5	47	202.34	2.96
Alteromonas macleodii	1	-114.81	35	79.03	5.09
Bacillus subtilis	1	-199.28	47	88.57	4.4
Burkholderia xenovorans	0	0	0	0	0
Chlamydomonas reinhardtii	1	-420.07	47	144.26	53.72
Chromobacterium violaceum	1	-231.15	47	122.36	23.85
Cupriavidus metallidurans	1	-678.22	47	281.36	45.47
Desulfovibrio vulgaris	1	-42.31	16	30.62	5.94
Enterobacteria_phage_ES18	0	0	0	0	0
Enterobacteria_phage_M2	0	0	0	0	0
Escherichia coli	1.02	-435.32	43	394.77	6.49
Escherichia virus M13	0	0	0	0	0
Nitrosomonas europaea	0	0	0	0	0
Nitrosomonas ureae	0	0	0	0	0
Nitrososphaera viennensis	1	-95.46	42	32.29	11.5
Nitrosospira multiformis	0	0	0	0	0
Paracoccus denitrificans	1	-119.88	45	70.67	8.84
Pseudomonas.sp.ATCC.13867 (or Pseudomonas denitrificans)	1	-232.2	47	179.49	12.98
Pseudomonas fluorescens	1	-414.99	47	244.32	16.17
Pseudomonas furukawaii (or Pseudomonas oleovorans)	1	-282.26	35	200	12.94
Rhizobium leguminosarum	1	-463.72	47	224.38	21.6
Roseobacter sp AK199	1	-177.79	46	86.3	15.76
Salmonella enterica	1	-821.9	47	516.32	21.85
Salmonella phage FelixO1	1	-24.91	1	4	2
Salmonella virus P22	0	0	0	0	0
Staphylococcus aureus	1.22	-180.7	37	89.24	6.3
Stenotrophomonas maltophilia	1	-629.06	47	241.64	65.62
Thermus thermophilus	1	-186.81	47	73.34	15.11
Staphylococcus epidermidis (contaminante)	1.19	-111.88	21	66	6.05
True Positives Identified When Searching DB-Largest
Species	Expected Rank	Expected natural log of E-value	Number of times specis is identified	Expected number of identified peptides	Expected number of species specific peptides
Agrobacterium fabrum	1	-268.95	46	169.3	0
Alteromonas macleodii	1	-86.49	31	65.06	2.32
Bacillus subtilis	1	-137.85	47	80.47	0.17
Burkholderia xenovorans	0	0	0	0	0
Chlamydomonas reinhardtii	1	-320.37	47	113.74	36.89
Chromobacterium violaceum	1	-149.79	47	91.91	6.38
Cupriavidus metallidurans	1	-439.29	47	216.17	24
Desulfovibrio vulgaris	1	-34.47	16	24	4
Enterobacteria_phage_ES18	0	0	0	0	0
Enterobacteria_phage_M2	0	0	0	0	0
Escherichia coli	2	-419.49	42	366.21	2.14
Escherichia virus M13	0	0	0	0	0
Nitrosomonas europaea	0	0	0	0	0
Nitrosomonas ureae	0	0	0	0	0
Nitrososphaera viennensis	1	-70.98	41	25.56	6.56
Nitrosospira multiformis	0	0	0	0	0
Paracoccus denitrificans	1.05	-65.91	39	57.79	3.44
Pseudomonas.sp.ATCC.13867 (or Pseudomonas denitrificans)	1	-129.49	44	135.27	5.45
Pseudomonas fluorescens	1	-249.42	47	227.3	2.81
Pseudomonas furukawaii (or Pseudomonas oleovorans)	1.16	-173.65	31	174.32	0
Rhizobium leguminosarum	1	-309.12	46	178.37	7.93
Roseobacter sp AK199	1	-99.01	46	65.02	8.89
Salmonella enterica	1	-632.49	47	433.62	5.66
Salmonella phage FelixO1	0	0	0	0	0
Salmonella virus P22	0	0	0	0	0
Staphylococcus aureus	1	-141.49	31	85.1	3.84
Stenotrophomonas maltophilia	1	-414.29	47	194.79	1.6
Thermus thermophilus	1	-137.03	47	58.02	4.96
Staphylococcus epidermidis (contaminante)	1	-114.37	16	81.12	6.44
